# Supplementary material for: Integration of Repeatomic and Cytogenetic Data on Satellite DNA for the Genome Analysis in the Genus Salvia (Lamiaceae)
Source: MDPI journal article supplement (doi:10.3390/plants11172244), 2022-08-29

## Supplements:

**Table S1.** Characterization of the satDNAs revealed in repeatomes of *S. officinalis* and *S. sclarea*

| Tandem Repeat/<br>Genome Proportion, % | Repeat Length, bp | Sequence                                                                                                                                                                                                                                                                                                                                                                                                                                                                                                                                                                                                                                                                                                                                                                                                                                                                                                                                                                                                                                                                                                                                                                                                                                                                                                                                                                                                                                                                                                                                                                                                                                                                                                                                                                                                                                                                                                                                                                                                                                                                                                                                                                                                                                                                                                                                                                                                                                                                                                                                                                                                                                                                                                                                                                                                                                                                                                                                                                                       |
|----------------------------------------|-------------------|------------------------------------------------------------------------------------------------------------------------------------------------------------------------------------------------------------------------------------------------------------------------------------------------------------------------------------------------------------------------------------------------------------------------------------------------------------------------------------------------------------------------------------------------------------------------------------------------------------------------------------------------------------------------------------------------------------------------------------------------------------------------------------------------------------------------------------------------------------------------------------------------------------------------------------------------------------------------------------------------------------------------------------------------------------------------------------------------------------------------------------------------------------------------------------------------------------------------------------------------------------------------------------------------------------------------------------------------------------------------------------------------------------------------------------------------------------------------------------------------------------------------------------------------------------------------------------------------------------------------------------------------------------------------------------------------------------------------------------------------------------------------------------------------------------------------------------------------------------------------------------------------------------------------------------------------------------------------------------------------------------------------------------------------------------------------------------------------------------------------------------------------------------------------------------------------------------------------------------------------------------------------------------------------------------------------------------------------------------------------------------------------------------------------------------------------------------------------------------------------------------------------------------------------------------------------------------------------------------------------------------------------------------------------------------------------------------------------------------------------------------------------------------------------------------------------------------------------------------------------------------------------------------------------------------------------------------------------------------------------|
| <i>Salvia officinalis</i>              |                   |                                                                                                                                                                                                                                                                                                                                                                                                                                                                                                                                                                                                                                                                                                                                                                                                                                                                                                                                                                                                                                                                                                                                                                                                                                                                                                                                                                                                                                                                                                                                                                                                                                                                                                                                                                                                                                                                                                                                                                                                                                                                                                                                                                                                                                                                                                                                                                                                                                                                                                                                                                                                                                                                                                                                                                                                                                                                                                                                                                                                |
| SO3/ 1.3                               | 687               | <p>GAAATCCAACCTTTAGACCGCAGCGCTCGACCCACCATGTGCCAGGCTATTTTGGCCACATCTCATTCCCCGGGGTAGGATCCGGTGGATCTTTACGTCGTCGGGGCTCATATACGAGGGGGAAGCTATCACGGAGTTCTACCCCGTTCTGAGCCGGCCGAAAAATAAGGATACCTTACGTGAGCTTGAATAGGCTATATTAAGCCATATTTCTATCGATACGAAAAATATCGACCGAGCCGAATGTCAAATCAAACCATCCCAAGTCCTTGGTCTATAAAAAAGGATCCTAACGCCGTGTTAATCACTCCAAAAGACCGGATAAAGAAGGAGATATGGCCAAAACGGTGTTCGCGTTGAACGCAACCGTAGCACA CTCCAATTTTTTGGCCATATCTCATTGTTTCTAGTCTGCTCACAACGGTCTTTATACCGTTGGA AAGCCACTTCAGAGGGGTACAATTTTTCTGAGTTAGTTTCTCAAATCGAGCACTAAAAATGGTC CCGAAATCCAACCTTTTCCGACCACAGCGCACGATGCAACGTGTACCTGGCTGATTTCTTGGCC ATATGTAATTCGTGAGTGTCTTCTCCAGCGGTCTTTTACCCTGGAAAGCTTACTCACAGGG TTATGACTCTAGTACAGACAACCTTCGAATTGGGCCCTTTTCGAGCTTG</p> <p>CAAAAACTTCTCGGCTTTGGAAGGTGGGAAGTATTTCTCCAAGAACAATCGGCACATATCCTTC CAAGTGGTGACCTTCTCTCGATCAAGCTCCTTGTACCATTTCTAGCTTCTACACAACATCAACC TATGTGCTTGATGGTTAGGAATCCATAAATTACCTCCAACACCTCTATCATCCGTTTAAACA AGAAAAAGGCGGGCTAAGGCTCAAAGAGGCTAAATCAAAGGATAGTGGGTATGTGGGGTTAG TGTATAGGATATGTCCATGGTTGGTGAAAGTGGCGGTGACAAAGGATGGCCTAAGATCACTT CCTAGTTCAAACACACACATGTGGTCTCGACGGAGAACCAAGGCAAGTTCTAGAATCCATATG CATGTATGATATCCCTCAAGCAAGAAAAATAGGCATAAAAATGCACAAAGGCTCAAATCTCAC GGGATAATCAAATAGTTCTCAAAATCAAAGGCAACTAATCCAAATTCATCATGCAATGCGTCA CTTCCGCAAGGTTCCAATCATAATAAGCCAAAAATGCTATGAAATCTTATCAATCGCCGGCGCC AAAATTTGATAGCACTTTTTCTAACACAAAAATATGCAAGAAAAATAGGGCAAGTATTATATATC GTATCCACAGAGACTGAATATCGAAATTACAGCAAGTAATCCTAGTTGAGACTTCACCTCTCTC CCCCCAAACTTATTCCACACAATACAAGGGGAATAAGGTTGGAAAAAGAAAAAGTGGCTATCT TAAGCAACTTAATAAAAGAGAGAGAAAAATAGATATAAAAAATCAAAGATTAAGGTTGACCC TAGGCAAGTGCTACTTTTAACCAAAATTCACACAATTAACCTATTAATCTATTTACCAATTTAAT CCAAATTCATATGAAGGATCACACATGCAACCATAAAATTCGCTAGGATAGATTATGATAGT AGGCTAGTCTAAACCTATCTCCGCTAGGTCTCAAGGGAAGTAAACTAGTTACCAAAAAGCTCC GACGTATTTAAATCCCTATGAACAAGTTTTCCTCGGGTAGGATAAACAAGTATCATATCATGCT TCAATCATTCAATTATGCAGCATTGTAAATAGACATAAACTACACAACCTAGGCATGCAAGACT AGTGATCAATTAATCATGCATGAGAATAAGCTCATTGAAACATAGAATCCAAATTGGAAAGCA TGACGAAGTCAAAAGGAATAATCCATACAAAGCTCAACTAGTTCAACCAACCTAGGATCAT GAGAAGTTTAGCTACTCATGATGAGGAGAAAGACATAAAGTAAATAATACTCCCCTGTATTGA GCTAATGGTAGAACTTGCATAAACTTGAAGTAAGCCAAGATCACACAACACCTTGGAGAAGG TTTGAATCTAAAACTCCAAAGAAAACTCCCCGGATCCTTTTGCTTTGATGGGAGCTTGTTTT GAAGTATGACACTACACTCCTCGGTGAGGTGATCGTCTCAAACCTTGCCCAATGCCACCGCATC CTTGAGGAACCTTCACATACCCCGGCCATGAGGGATGACGAGAAGAGGGGGTTTGAGGCCTATT TATAGAGAGATGTCCAAGAACTTCTGCAACTTCTCGTCGTAATTCGCTTGGCTAGGCATTGAG GAAACGGAGCTCTGGGAGGAAAGTCTTGGGCTCAAAGTAGGTCTCGCCGCCAAGCCTCTCGGT CTGGGTCTCGGTGAGACCTGGACCGAGAGGGCACTGGCGGAGTTTTCGTTTTGGCTCGTTCTC CCTCGTCCGGAATCCAAATCACGAACGGTTTTCGCTACGGACTCCTATCGAGATGGACTTCAA TCCTATGCATTCCAAACTCCTCAAATGATCCATCATGTTTCTGTAATTTTCTAAACTTTGAGGC TTGAATCCATTGGTGTAGTTTCTTGGTCTCTTCGAGTCTTCTTCAACACTTGGGTGTCTTTTC ATCTAAAAACCTACAAAACATACCAAAACAACCAAAAGCATAACAAAGCTCGACAAATGATA AAACATATCCTAAACGAGCTAAAAGACCTTGAAAACCAACAAAACCTAAATAGGTAATAAATA GGGCTCTATCAACTCCCCAACTTAACCATTTGCTCGTCCGAGCAACAAAGAAAAACAAAAC AAA</p> |
| SO4/ 1.2                               | 2884              | <p>CGCGGGCAATGCCGCTCGCACACCTTGTCCCTCCCGGTTTTCTGTGTCCAAGCGTACCCAATGCT CGGGTGTGCTAGCTTGTGTTTTGCTTCCGGAGATGCTACGCATACCGGTGGCGGAGCGCGGGC TTGTGCTCCCGGCATTGTGTGCGTGGCGATGCGTGGTGTGT</p> <p>CGGCACCAGCACGGGCGCCGCTCGACGGGACACGGCACAGCACGGGCGGCCGCTCGACGGG GCACGAGTCTCGCGCACGGGCGCGCGCATCGTCGGGGGTGCCCCGCGCAGGGGCGCCCGCT CGACGTGACT</p>                                                                                                                                                                                                                                                                                                                                                                                                                                                                                                                                                                                                                                                                                                                                                                                                                                                                                                                                                                                                                                                                                                                                                                                                                                                                                                                                                                                                                                                                                                                                                                                                                                                                                                                                                                                                                                                                                                                                                                                                                                                                                                                                                                                                                                                                                                                                                                                                                                                                                                                                                                                                                                                               |
| SO44/0.37                              | 170               | <p>GCGCGGGCAATGCCGCTCGCACACCTTGTCCCTCCCGGTTTTCTGTGTCCAAGCGTACCCAATGCT CGGGTGTGCTAGCTTGTGTTTTGCTTCCGGAGATGCTACGCATACCGGTGGCGGAGCGCGGGC TTGTGCTCCCGGCATTGTGTGCGTGGCGATGCGTGGTGTGT</p>                                                                                                                                                                                                                                                                                                                                                                                                                                                                                                                                                                                                                                                                                                                                                                                                                                                                                                                                                                                                                                                                                                                                                                                                                                                                                                                                                                                                                                                                                                                                                                                                                                                                                                                                                                                                                                                                                                                                                                                                                                                                                                                                                                                                                                                                                                                                                                                                                                                                                                                                                                                                                                                                                                                                                                                                            |
| SO46/ 0.36                             | 135               | <p>CGGCACCAGCACGGGCGCCGCTCGACGGGACACGGCACAGCACGGGCGGCCGCTCGACGGG GCACGAGTCTCGCGCACGGGCGCGCGCATCGTCGGGGGTGCCCCGCGCAGGGGCGCCCGCT CGACGTGACT</p>                                                                                                                                                                                                                                                                                                                                                                                                                                                                                                                                                                                                                                                                                                                                                                                                                                                                                                                                                                                                                                                                                                                                                                                                                                                                                                                                                                                                                                                                                                                                                                                                                                                                                                                                                                                                                                                                                                                                                                                                                                                                                                                                                                                                                                                                                                                                                                                                                                                                                                                                                                                                                                                                                                                                                                                                                                                  |
| SO48/ 0.34                             | 9722              | <p>CACACTAGATCACAAAGCGGATAAGCATCACACACAACAAGATGTATATCATATAAGATCATAG AGATAGGAAAAGATTGATGATAAATCAATAAAGTCTCTGAAAGATAGACATGCAGAAAG</p>                                                                                                                                                                                                                                                                                                                                                                                                                                                                                                                                                                                                                                                                                                                                                                                                                                                                                                                                                                                                                                                                                                                                                                                                                                                                                                                                                                                                                                                                                                                                                                                                                                                                                                                                                                                                                                                                                                                                                                                                                                                                                                                                                                                                                                                                                                                                                                                                                                                                                                                                                                                                                                                                                                                                                                                                                                                            |

ATTACCAAGGATTCTGAACCGAGAGAGAGAGAGAAGAAGAAAGGGTTATGCAGATGCCTACG  
AGAGGGAGAAAAGAAACAGACAATGTTGGCTGGCAATGTTAGGTCGAAGACAGTCAACATCCA  
TACCCAACATTCTATAACAGAGACTTGGCACTTATGCAGATTTTTGTTCTTTAGAACTTTTGGGA  
TATGATAAGATTTCAACTTCATTTTCCCTTGAGTGCATCGTCGCTGCGAACGCCGTGCCCCGAG  
TACTTAGAAGTGAGCTTTTGCACGATCCCTTTGAAGAGAATGTTTCTGACCATTAAGCCTCA  
CTCTTGCTGCTACAGGTCTTATAACATCATTGTTGTGTACACCAACATCTGCTTATGGCACAAGT  
ACTAACACAAAACGTCGGAGTACAAACATAACTTACTTCTCCCTGCAAAAGCCAGCAACATTA  
AACACATGCATATGCCATAAAAGAAAGAGGAAAAACAAACACAAGCAACAAAACAGAATGTTG  
GGATCCAACAAAATCCTAAGTCCCAACATTTCGAGCCACACACCTAGACTAGATGCAACACAGG  
CCAAGAGACTTCTAAGGTGAGAAAAATCTCTCAAAATCCAAGGCTTTGGTGAAAAATATCTGCT  
ATCTGTTTTTCAGTTGGAACAAATTTAATGCAAAATCAAGTCTTCTCAACTAGATCTCTAATGA  
AGTGATGCCTGATGTCAATGTGCTTAGTGCGAGAATGTTGTACAGGGTTTTTTGAAATATCAAT  
AGCACTCATGTTGTACATAACACAGTCAACATATCATTTCATACCATAGTCATCCAACATT  
TGCCCTAAGCCAAAGAAGTTGAGCACAGCAGCTTGACAGCAGAAATATACTCAGCTTCGGCAGTA  
GAAAGGGAGACACAATTCTGTTTCTTGATGACCATGACCATGACAGCAATTGTTACTCCGAAATGA  
CATCCTCCACTGGTGCTCTTCTATCATCTGCATCACCTGCCCAATCAGCATCACTAAAACCAA  
CAATGTTAGTGTTAGTGCTTTAGAATACCACATCCCAAGTTCAGATGTTCCAGCAACATATCG  
GATGATCCTCTTGACCGCTTTTCAGATGGGATTCTTAGGCATGGCTTGATAACGAGCAGACAGC  
CCTACACTGTACATTATGTCAAGTCTGCTGGCAGTAAGATACAGCAGACTTCCAATCATTCCAC  
GGTACAATGTTGGGTCAACATTTCGCACCAACATCATCTGCACAGCTTATGATGTTACTGACCAT  
GGGAGTCTCATATGCTTGGCATTCTCCAGTCCAAACCTCTTGACAAGTCTTTTGGCATACTTA  
CTTTGTGAGAAGAAAATGCCCCCTGGTGTTTGCTTAACCTGTAAACCAAGGAAGTAGTTAGCT  
CACCTACCATACTCATTTCAAATGTTGTTGACATTGCTTTCACAAATCTTCAACAAGAGCAGA  
GTTAGTAGCACCAAAAAACAATGTCAACATATATCTGCGCAAGATGATGTTACTGACCATGC  
TTCTTGATAAAACAAAGTCTTGTCAACTTGACCTTAGTGAAACCAAAATCAAGGAGAAACACT  
GTAAGACGCTCATACCAGGCTCGAGGAGCTTGTTTAAAGACCATACAAAGCTTCTTTCAGTTTAT  
ACACATGCTCAGGTTTGTTAGAATCCTCAAAACCTTAGGTTGTTCAACATAGGCCTCTTCAGA  
TAACATTCCATTAAAGAAAGCACTCTTAACATCCATTGTAGCAGAGATGCTTACTGACCATGC  
GCAATGGCAAAACAGGAGTCTAATGGATTCTATCCTAGCAACAGGAGCAAAATGTTTCATCGAAG  
TCAACCCCTTCCACCTGAGTGTATCCTTGAGCAACAAGTCTAGCCTTATTCCTAACAATGTTAC  
CCTTTTCATCAGACTTGTTTTTGAAGTCCACTTGGTTCCAATAACATTTCTATCACATGGTCTA  
GGCACAAGTTCCACACATCATTGCGCACAACACTGATTAAATTCATCATGACATGACATCACCC  
AGTCAACATCAGTCAATGCTTCTTTAACATTCTTAGGTTCAACAAGGACATGTAAACATGCAAA  
CTCAACTTCTTCACAAACAACAGATAAAACAAGCAATTCTTACCATCTCCCGGTAGTTTACCTGA  
CCTTTCTTTCTAGTTTGCATCTGTCCAGAAGCATCCCCAATGATTGTTGGTCTTTGGGGTGATCTTT  
TCTGATTCTTCCAGGTGGGTCTCGCCTCACTTGATCATGGAGAAAAGCACTGCCATCATCACCT  
TCATCATGTCAAGGATATTGTCTGTGATCTTCAGTAGTGTCATGAGTGTGAGGATGTTGGGACAA  
CATCGGGTTGGACATGTTGTTCTGGTGTTTGTCCGATGTTGATTGTACTTCCAACAGATCAGTA  
ACATCATCTTCATCTGTTCTATCTGCAAGGCTCAACATATCATCGAAAACCACATTTCACAGTCT  
CTTGAATGGTTTTAGTCCGAAGATTATACACCTATAAGCATGACTGTTTGCCGAGTAGCCAAAG  
GAACATCCCTTTATCACTTTTGTAGTCAAACTTGCTCAAAATAACCTCATATTTAGGATGTAAC  
AGACACAGCCAAACACATGAAAGTATTTGAGGTTAGGTTTTTACCTTTCAAAATTTTCATAGGG  
AGTTAACATTGTACCCGGCCTCAAATAGACTCTGTTTATGATGTGACATGCAGTGTTAACAGCT  
TCAGCCCACAATCTCTTGAGAGGTTCTTGGTGTTAAACATTGCTCTCACCATCTCTTGGAGAG  
TGCGATTTTTCTCTCGGCAACACCACTTCTGCTGTGGGGTTTTAGGAGCAGAGAAGTTCGGAA  
TATACCATTGTTAGCACAAAAATCAGAGAACAAAGAGTTCTCAAAATTCCTACCATGATCAGTT  
CTAATCCTGACAACATTCTGTCCATATTGAGCACGAAAACGTTTGTACAGCTTTTTAAACATGA  
AGAATGTTTCAGACTTTTCATGCATAAACTCAACCCAAGTATATCGGGAAAAATCATCAGCAC  
ACACAAGAACATACCTTTTCCACCTAGGCTTTCACTTCAATGGGCCCATGAGATCCATGTG  
AAGTATTTCAAAACATCTAGAGGTACTGCATGTTGATAACATTGGATGTGAGGTTGCAACCTGT  
TTTCTTTCTGACATGGTCCACAAACCACTTCATTCTTGATCACCAGCTTAGGTAGACCTCGAAC  
AATATCATTTGGCTATCAGTTTCTGGAGATTCTTCAAGTTGACATGCCCTAATTTCTGATGCCAG  
AGATCAACATCACACATCTTGGCTGTGTGGCAGCTGTTGTTGTGTCAGTCTTTAGCAGATTGT  
CTGAGGATCTGCTTCCACCATAAATGCGCTTGTGGAGTCAACAAAGTCTCGCATATATTCTT  
ATCGAACTTGACAAACATCCCATCATCACAGAGTTGGCTGATGCTTATCAAGTTTGTCTTCAGC  
CCTTCAACATGATGAACATTCTTCAGCTTTGGGAAGTCTCTAACATTCAATGTTCTTTCCCAAC  
AATCTTGCTTTGGCTCCTCCTCCGAAAGTAACATTTCCACCTTCTGTTGGAATGTAGTCACTCA  
GGAACCTCTTGTACCTGTCTATGTGTCTAGAACAGCCACTATCAAAAGTACAGTATCATGAGAT  
GTTAGCATTGAGAGAAGTGAACACCACATTGCATGTGTTAGAGAAGATTTTATCAGTCATAGC  
AGAAATGTTTCTCAGAGAAGTGAACACATCAGACTGATAACAGTCAAAACATCCCTTGGCCGA  
TGTTACATCAACATTGTTGTGCAACTTCTCACAGTAAGGTTTAAATGTGTCCTGGTTCATGACAGT  
AGTGACACACATAGGGTTGCTTTGTTCTTGGGCTTCTTCTGAAATTTGGGAAACTTGCCACCA  
TTAGAGCCCATGAACACATTAGCATTTCCCTTCACTCAAAAAATACGGGAGCACTACAATTCTCAT  
TCAACATGTTAGTTTACCTGAATCAAAACCAAGGCCATGTCTGCCAAAAGATTTCTGAGATAA  
AACACAGTTAAGATCAGAAGTTCCTTTGTTAAGGCGATCAAAAGTTTTTTACGCTTATACACT  
TTACCTCTTAGCTCAAAAAGTTCAGTATCCTTTCTAGTGAGGAGGACTTCAGCTTTAAGACAC  
GATCTTTTAGGGTTTGATTCTCATCTAGGAGACCGAGAATGTCCCTTCTTTGCTCTTCAATTGA  
GCCTCAACTTCATCATACAAATGTCTGATGTCTCAATAGCTTTGAGGGGATCAAACTCCTTTT  
CTTCTGAGGCTGCAACACAACAAACATTTCTTGAAAGATTTTCAGCTTCATCAAGAAGAGTCAT  
TTCATACCAGTTTGTGTCGATGTTGGAAAGGTATGACCATCAATGTTGATCATGCAAAAGATCT  
TCCTCATCAATATTCTGTGAGTGCCATGACATCCTCATCTGAGAACTTTCATGTAATCCTC  
TCCAATGTTGGCCATGACTTCAATCATTTCAGCCTCTGAGTCATCAACATTGTCTATCAACATCGT  
CTATTGTTGCAATCAGCAGCACCTTTTCTCCTCTGAGTCAGAGTCATCGCTCAAGGAGGCAAC  
ATGGCTGGCCTGTCTTTGCTTTTCTTGGCACTGTGGGACATTCAATGATAGTGTGCCCCATTC  
CAGAAATCCCTGCACTGAATACTGATGAGTTGAGTTGCTCCTCAACACAGGATTTGTAATGT  
TCGTCTAACATTGGGAATGTTAGAGGAGCTTGGGAATTTTCCAGTGGTGTGTTGGTGGCAGCCCTT  
CTGGTGTTAGAATTTGGGACCGATTTTCCATTCTGATAGATTTTACCAGATTATTGAACCTCTT  
GGTCAACAGGGCAATGTTAAGATCTTCTTCATCATTTGTACATTCAGACACTGTGTTACAGTA

TCAGCACTAACATTGGAAATCACATTAGAGCTTTTCAGCCTGAAAGGCAACATGTTTGGACTTGT  
AACCAGCCTTCTGTTGGTCGAGATTCTCAAAAGGTAATCAATTTGCTCACAAGATCACCTAT  
CCTCATGGTATTAACATCAATAGACTCCTCGATAGATGAGATTTTCATATTTGACCTTTTCGGGA  
AGAGATCTCATCTTACTTACCAATTTCTCATTAGCAATTTGGTTCTCCAAGTCCAACAGCCTC  
GTTTGAATTTCACTTAACTTCTCATAGTATGATGGAATGGTTTCATCTTCTTGCAATTTCAACA  
TCTCAAATCTCGTAGTCAACATCCTCATCCGTGTTGCCCTGACACTCGTGATCCCTCACATTGT  
TCCTGCAATATAAGCCAAAGCATCTCGAGCCTCTGTGCAATAGAGATCAACGAACGCTCTATTGGGA  
ACATCAACACAGATAAAAAATAGCATTTAAAGCTCTAGCATTGAGATTAGAGATAAGTCTCTCTT  
CAGCAGTCCACTGATTCTCATGTTTGTGGTGACAACATCATTACCGTTTCACGTGGAGGAGT  
CCACCCATTTAACACAGCAAGCCACGCACGCTCATCAATGGATCTGATGTACATTGTCATGCGC  
GACTTCCACAAAGAGTAGTTTTTCCCACTACTATCAAGTGCCGGAGGTGCAACGGAAGCGTTG  
GAAGCGTCCATCAGTAGTAATTTTCGCACACAGGAACGGTCTTAGTTCGTCGAAGAACCTGCTCTT  
GATGCCAATTGAAAGAATTCAGTGCCTGAATTACTACTTGTAAACACTGTGTGAATGTTAGTAG  
AGTAATGTTACTAGCAATGTTAATAACATTCCAAGCAACATGCAGCGGAAATTAAGAAACACA  
CAGGATAATTTTTGCGGGTTATGAATAACCCGCGTTGCCCTACGACAACCAAGCTCTATTGGCA  
CTTAGAACAGATTACAAGAGTTACACCAGGAAACCTATCTACGGATTGCACTACCGCCTATGA  
TAAAATCACCTAGTCTAACACTGCAAACTGAATGTTGCAACAAGCAAAAACAGTCGATACAAA  
GATCGAACAACCAACCTGAACAGTGCAAGACGACTCGGTCTTCAACCCACCCCTTGCTTGCCT  
AGCAATACCGTGGTCGATGTTTACAGATTGGCTGCCTAACACCGCCTCAGTTTAAAGCGTGGTTG  
AAGATGCGTTTTCTACTGCGTTTCAGGAAAATGACGGAAGGTGGAGCGTATGATATCTCTC  
AGAAAATAGCCTTCCAAATCCGTGCGTGAGAATGATCCATCTTGCAGCTTTTATAGAGGTGTAT  
TTCGTGGTCAGCAAGGTCCACTTCCACGTCCTATAGCACTCTACAACTGCTGCAACCGCTCC  
AGAAAACCTGCTGCTCGAACTGCTGCAGAATGTTAGTGGAGATCATGCTCCTTAAAAATAGGAA  
CTAACTCCCCATGATCTTGAATCCATGATTTAACTAATCTCCACTTATCAACAGCTCCCAACT  
GCAATCCACGATTATTAGAGTAACAAAGAATATAGGAAACGTGGAGGAAGGTAAAGATTACA  
TATATACAGTTACGTTTGGAGAGTCGAAGTTCAGCTTCAAGGTAGACTCCAGGAATGTTGACTG  
TACCCAGATGTTACCAACATCGGAATGTTACTAACATGCTATCCAACATTGTCTGGAGTCAACAT  
TGACTCTAACAAATCTCCCCCTTAATCTTAGCCCTTCTGCAAAATTTCTTCAACCAACAAACA  
AAGAAAACCAAAAACTATTTACAGAAAAAGAATTCTATGTTACAGGTAAAGATCGAAGGAAA  
GTGTGGAAACTCCCCCTCAATCAAACAAGAGGTAAACCTCAAAACATTTCAGAGAGAAATGTC  
AGACTAACACTCCCCCTGAAACAAACACGGGAGAGACTAAAACTCCCCCTAAACCAATGAAGG  
TCGGCCGAAGGCCAAGACCTTCAATTCGATGTTTCTCGAACTGACATGACTGAAAAGAAAC  
AAGCATAAACAACCTAGCAACATAAACATTACACCTTACACCATGACAAAGTGAAGGAAATCA  
TGCATCATTGCCAAAAATCAAGGTGTCCATACACCAAAACGATCAAGATGTCCATGCATCAAA  
AACCAACTAAAGGAACCAAAAGTGTCTAGCACTTAAACAACAACCAAAATCGAATAAAATGTTTT  
TGGAGCCAACATCAAAAACAGCAGCAAGCAGGCGCGCGCAGAAATAGCTACTCCCCCTTTTT  
TGTTGAAGGAAAGAGAAAACGGCAGGACTTCCCGAACTCATGAAAGTACGATCAACCTGAGC  
AGAGAGGGAATGCACATCTTCTGGACATATTCAGCAAAATTTGGCAGTTGAGTCCGACAGTTT  
CTGAATGTCACCTTCAATTTCTTGAATTTCTTCATTGCAGCTTTGAGATCATCAGGGTGCATTT  
GAACTTCCAAGAAGTCGGTAGCAACATCCTCTTCTCCATAGGAGCTTTCCCTTTATCAGTGC  
ACGAGAGGTACCTGCATCAACATTAGTAGCAGAGGGGGCAGAGAAGCAAGACTCTGAGATG  
TGTTGGCAACATTGCTTCCAACATCCTTCTTTCTTCGATCCTTCTTCTACTTCTTCATCAGCA  
CATCGAAGGAGTCTTCTTCTTCTTTCACCAACATCCTCTGTCTCAACATCAGGAGTGTATCGA  
CGCTTGGCTTTAGGAGGACTGTAGGGGAGGTCTTCACTCTATCTGAGGATAAGATAGTCTTCG  
CAAACTCCAGTGTGTGCTCTCCTCAACCAACATTGTACCCTTCAAGCCCGCGTGTCTTCTG  
AGATCTCAGGAGGTTGTAGATCAGGCTCGGGAAAGGGAGAGTGTGGACCCCGACGACTTGAA  
TGCTGCACGTGTTATGAAGGCAAAACCAACTTACCAAAGTTGAAGTCAAGAGACTTACCAAC  
TTTATAGATAAATTTCTGCTTGATCACGAGTCAAGGTAGTTGAGTTTTTGTCTCGCAACCAAGT  
TACACACAAATCTTGTGCAATGTAGCATAGAGTCGAGAGAGTGAAGTACGACGATCTGAGGC  
CTCCACACATTCAGTCTGCCTCCAGTGATGTTTTCATCATTCTCTTCTCTCTACTGTTGACTC  
AACATCAACATCTTCAAAATAAAACAGCTTGTGATGGCCGAAGGAGAGCAATCAAAACCTTG  
ACCCCGCACATAAACCTTCCCAAATTTCTTGGAGGTGGTATCAGAAACCTCCTTCAAAAGATTA  
GAGTAGAACTCCCTAACAAACATCCTCATATAGGGATAGATTAAACACAGTGCCCCACATCT  
TCCTATCTTTTAAACAACATCAAGACATAATTCTTGAAATAATAGCAATAGCAATCTCTCTC  
ATTAATAAAGTTCTATCTAACATACTCTTGTGAATAGTCTTAGCCTCACGAGAGTAAAGCGG  
TTAGAATAAGCCTTACCAACCTCAATGTCAGAATCGGAATCCTCTTCAAGATTGCTTCTTGG  
GTGATTGAGAGGGAGATGCTCCACGAGATGATGTTGCCTTGCCACGAACCTTGGTGGAGATAG  
TCGGTATGGGAGCTCTTTCGTCAGAGATGTTGGGCTTCTTGGATTGTGATGTAAC  
ATCACCTTTACTGCGCTTGGGCAGATTTAAATTTGGCGGCACCGGGAGAGAGGATTTTGACCTA  
GTGCGACGAGCTGCACCACAGAGAGGGTGATGACCTTCTCCTTCCCTTTTCTCGTGCCCTCCT  
TTTCGCGCAATCTGGATGTCGTCTGTCAGCCACATCCTCTGTTTCTTCAACATCAGCCTTCGCC  
GGAGACGAGGAGACTGATCAACATTCTCTTGTGCTCCCTGTTCACTCTTCCATGGTGGTAT  
CAACATCTGCCTTTGAAGGGGAGCGAATCGACTCTTGGCTGTGCGCCGAGGCGAAAGGAACAA  
TCTGGGTCTTACCGGAGTTTCTCTCCTCCGTCTTCTGCTTCTTTCGCGCGCTGTCTCCT  
CTCCAACATCGGGAGAGACCCGCTTCTTCGCCGCTTCTTCTCTCCTCCGCTTTGCGGTGTAGAG  
AACATTCAAAGGAATGTTGTCTGGGTCTTTGCAATATCTTCTGGGAGGATCATACTGATTGGC  
TCGACATTCAGGAGAGGATCAGACTGTGGATCGGCGGTGTTGGACGGAGAATCGGATGGGTTC  
ATTTTGGACAATGTTGGGCGAGAGGATTGAGGGAGAGATGTGTTTTGGGCAGATTCGAAAATA  
GGGTTTGTGATGGGAGAGGAAGTCTGTTCGCTTCTTAAAGAGATGATAAATGCTGGGCAGCG  
GCTTCTGGGGTTCCGAACCTTCTTCAAAAGCTTTGAAAGAGATTGGCCAAGTCTTATCCATGT  
TGATTCAACACGCTGCACAAACACTTTAAACAACAAGAAGTGAAGGGGTTAGTGAAAT  
AACAGAGATATGAAGCACATATATATACCCCAACCGGCAGAGCCCAAGCCACACAAACACA  
AGGAAAAAACCTTAAAAAA

ATTGCGTCGCTTACGCCATTCTTTTTCCCAAAAATTGTTTTGGCCATATCTCCTTCGATATACAT  
CAGATTAGGACAATTAACGCGCGTGGATTCTTATTCGAGACCTACGATTGGGGATGGTTG  
GATTTGACATCACTCTCGGTGAGATTTTCGATATTTTCGAGCCATCGGTCTGAGAGGCTCATA  
ATCTTAGCGAATCCCATTTTTTAGCCCCGCTCCGAAAGGGGCAAGAAGCAGTCATAGCTTCA

|                       |      |                                                                                                                                                                                                                                                                                                                                                                                                                                                                                                                                                                                                                                                                                                                                                                                                                                                                                                                                                                                                                                                                                                                                                                                                                                                                                                                                                                                                                                                                                                                                                                                                                                                                                                     |
|-----------------------|------|-----------------------------------------------------------------------------------------------------------------------------------------------------------------------------------------------------------------------------------------------------------------------------------------------------------------------------------------------------------------------------------------------------------------------------------------------------------------------------------------------------------------------------------------------------------------------------------------------------------------------------------------------------------------------------------------------------------------------------------------------------------------------------------------------------------------------------------------------------------------------------------------------------------------------------------------------------------------------------------------------------------------------------------------------------------------------------------------------------------------------------------------------------------------------------------------------------------------------------------------------------------------------------------------------------------------------------------------------------------------------------------------------------------------------------------------------------------------------------------------------------------------------------------------------------------------------------------------------------------------------------------------------------------------------------------------------------|
|                       |      | CCCTCTTATATGATCCTTGACAACGTACGATTCCACCGGATACTACCACAAACGAATGAGATGT<br>GGCCAAAAAACAGTGAGAAACACGGTGGGTTGAACGCTACGATTGGAAATAACCAATTTTCGAC<br>ACCCAAAAAGGGATCCATTAGAATAATTGTCTAAGCCAAAGTCGTATCCCTCTGAGTAATCCTT<br>CCAACGGCGTGAGGACCAATGAGATACGACAACAAATGTGTGAGATATGGCTAAAAAGGCGA<br>GATAAATAGTGGGTCACATTTTATGATCAGAAAACTAGATTTTCGAGACCTCGAAAAATACCCG<br>ATTCGAAATATTGTGTCCAGAAAAGTTGTAGCCCTCTGAGTAAGCTTTCCAACGGGTATAAAGAC<br>CGCTGTGAATGGACCACAAACGAATGAGATATGGCCAAAAATACGGGCATGTACACCGGTTGCC<br>TTCTTTTTCCTTTTTTTTTTG                                                                                                                                                                                                                                                                                                                                                                                                                                                                                                                                                                                                                                                                                                                                                                                                                                                                                                                                                                                                                                                                                                                                                                                    |
| SO107/ 0.058          | 362  | TTGGAGGATCCGCCAAAAATACGGAAAAATTTGACCGAGCCAAATGTCGAATCCGACCTCCC<br>AGACCTTAGGGCTATGCATAAGGATCACGAGGATGCGTTATGGGCCCCGAGACGGCTACGAA<br>GAAGGAGATATGGCCAAAAACAGTGTCTGGCAAAGGCCAATCGGAGCGACGCCGGCGTTTATG<br>CCATATCTCAATCGTTTGTGGTCTGTGCGAGCGGTCTATATACCGTTGGAAAGCCAATTCAGA<br>GAGCTACGACTTTGCTGGATGGTATTGGCAAACGGGATCTGCATCGGCCCAAAAATCGAC<br>TTGAAGAGCTTGCCGTGAAAATGAGATTTTCTCAAAGGGGTACCC                                                                                                                                                                                                                                                                                                                                                                                                                                                                                                                                                                                                                                                                                                                                                                                                                                                                                                                                                                                                                                                                                                                                                                                                                                                                                                             |
| SO108/ 0.056          | 352  | CAGAAATTTTTCTGATTTTTTGGGCCCTTGTCTATTGCGTCGACCCAAGCAAATATTCTCATTTTT<br>ACGAAAGGCTTTTCGAGACCCGAAAAGGGTCCGAATCGAAAAATGTCTTCACCAAAGTCGTA<br>GCCCTCTGAATTATCTTTCCAACAGCATAAAGATGACCGTGACAGGACCACAAGCGAATGAGA<br>TATGGCCAATAAACAGGGCTATTCTTCAATTACCTTTCACCCGAACACTGTTTTGACCATATCTC<br>CTTAGATATGGGCTGTCTTGGGCCAATTAACACGGCCTAGTGATCCTTATTGCGTGCCCTACGG<br>CTTGGTAGAGTCAGATTTACATTGGCTCGG                                                                                                                                                                                                                                                                                                                                                                                                                                                                                                                                                                                                                                                                                                                                                                                                                                                                                                                                                                                                                                                                                                                                                                                                                                                                                                                  |
| SO113/ 0.052          | 178  | CAAATCCTAAACCCTAATTGTAGATTTTAACCAAATGTCTTATTGGTATGCTTTATTTGTCTCA<br>TTTTGACTTCATATTAGCCTCATTTGAGACTTCATATTGTCTCGTTATAGAAATTGTGGACAC<br>TTGTACCGTAGGAGTATATATGCTTCTCTAAGCCCTAAACCCTAATTT                                                                                                                                                                                                                                                                                                                                                                                                                                                                                                                                                                                                                                                                                                                                                                                                                                                                                                                                                                                                                                                                                                                                                                                                                                                                                                                                                                                                                                                                                                             |
| SO145/ 0.032          | 1564 | TTCTTTTCAGGCATGGAAGTGCAGCTATGAGTTCTTGAGCTAATGAGCTAGGCTGCTCTGAGCT<br>AACGGCCCGTCAATTCTGAGTCATCGATGGAATTGAATAAGGGCCTACCGATCCTGTTGCTAG<br>AAGCTAATGAGCTAATGTAGCTACCCGCTCCTACCATTCCGAAGGCATCCAAGGAATGGAATA<br>AGGAGCGACCTTCTCTCTTCTATGAAGCTATGAGTTATTGTAGCTTCTTGTGTTTATGAGCTCT<br>TAGCTACTCCTTTCCTTTGTCTTATCTTATCTTGCTTTCTATGGCTTTAGAGTTGCTATTAAAGAG<br>CTATAAGAGGCAGCTAAGGACTTGTGTTTGAACCTCTTTAGCTGCTAACTATCTCTATAGCC<br>CGGACCATGAACACAATCTGAACTCGGACTTGTGACAACGACAACGAGGGCTCTGCTTCTC<br>TCTGTTTTCTCCTGGGTAAGTACTAGAACTTGAGAGTCAGGATTTGAAGACTCTCAAGGACG<br>AGGAAAGCAGCTCAGTATGAACTACAGTGATTACACCGTCAGAACAACTCGAACCAAGAGA<br>GGGGATATCCACTGATATGCCGAACGATAGAGCTCCCGAACTTGTCGTACATCGAACGAAC<br>CCTCGGATAGGAACTCCTTGTGTTTCTGTTCTTTTCACAAACAAACATGTAACCTTTTCTCTTC<br>CTTACTGAAAGCCAGAGAGTGACCTACTAGTTGTAGGGCAGGATCGACTTAGAGTTGCTAAGA<br>GCGCCCCCAGTCCCGTACACAAAAAGGGAGGGATGGGGGGTGCAGCTCAGAGTGAAGAAAG<br>GAATGGAACCAAGTGATGGACTGTGAGGTGACAGGCCAGAACGATATGGTACCAGGAGTTAC<br>GCGCGCGCACGAGGAGTTCCAAAAATGGCTTTCCTCGATAAACTCTGTTGTTTTATTGCGCGCC<br>CTTACAAGTTGTTGTAGCTGTCTTATTGCTGCTTCTAGTCAAGTACCTGTACCAAGTATGG<br>AGCCAACGTCGATCGCTTTCAGCTTGGGAACCTCTATTTTCGCTCGATGAGAGGATTTCCCGCTA<br>TCATCTAGGGCCTTTATGGGTTTGAAGCAAGCCACCCCAAGTTCTAGCACACTACTGCCTTC<br>TTGTCCCTTCGTTTCATAGCTAGGAGTTCATAGGTAAACCCAAGATAGTCTCACTTCCAGCAGTA<br>TTCAATCGACTGATGCTACACTTGCTAACCATCTCACTAACTAGACCGAAGGGGTTCACTAGTC<br>ATCTACGACATTTCCAATTGAACTCTAACTCCTCATTTGTTGCTTGTGTTTTTAAAAACAGAC<br>ATGTAAACTTGTCTCTCATGAGCTGTTTGGCAGTGAGTGACCCATCGAAATGGGGCAGCAAC<br>CCTAAGAGTCTCTTTACTGAGCTCCTGTTTACAGTTGTTACTGAGTTCTGTAGCTATGAGCT<br>AAGGAAGCTAGCTGCTAGAACGCGCTAAAACACGAGTTTAACAGGCCTCACGATAGATTGTAT<br>TCCAAGATCTGAAACCTTGCTTTTAAAGCTC |
| SO202/ 0.021          | 181  | GGAAATAGTTACCAAGTACATCACCATAAGTATTGGAAATTTCCACGGTAGGCGTTACCGTGG<br>AAATTATTCTAAGTGTAAGAAATTTTCACGAAACGAGTTTTCGTGGACATAACCATTAGTATTAG<br>AGATTTTCATGCTAGGAATTATGCTAGAAAGCACTGTATGTGTAGAAATTCAAC                                                                                                                                                                                                                                                                                                                                                                                                                                                                                                                                                                                                                                                                                                                                                                                                                                                                                                                                                                                                                                                                                                                                                                                                                                                                                                                                                                                                                                                                                                      |
| SO342/ 0.01           | 133  | ATATAGAATATAATATATGGAGTTTCATTATATTAATATACTCTATCATATAATATAAGTGAAT<br>ACATTATACTTATTCATAATATTAAGATATGAGACTATACTTTAGTCTTTTTCTTATTACTTTATT<br>TAA                                                                                                                                                                                                                                                                                                                                                                                                                                                                                                                                                                                                                                                                                                                                                                                                                                                                                                                                                                                                                                                                                                                                                                                                                                                                                                                                                                                                                                                                                                                                                       |
| <i>Salvia sclarea</i> |      |                                                                                                                                                                                                                                                                                                                                                                                                                                                                                                                                                                                                                                                                                                                                                                                                                                                                                                                                                                                                                                                                                                                                                                                                                                                                                                                                                                                                                                                                                                                                                                                                                                                                                                     |
| SS1 /1.9              | 362  | GAAAGTCGTAGCCCTCTGAACTGGCTTTCCAACGATATGCTGACCGCTGCGGGGCGACCTCGTA<br>CCAATGAGATATGGCCGAAACGCCGGCGTCCATTGCGCTCTACCGGAACACTGTTTTGG<br>CCATATCTCCTTCCCCGTAGGTGCGTCTCGGGGCCATAACGCGTCCATTTGATCCTTATGTATAG<br>CACTAGGCCATGGCAGGGTCGAATCCGACATCTGGCTAGGTCGAAATTTTCCGTATTTTCGGCC<br>AAACCTCAAAGGGGGTACCTTGGGGAAAAATCTCATTTTCAAGGAGAGCTATTACGGTCAAT<br>TTCAGGGCCCTTGACGCCCCGCTCTCGAAAAGTCCATCCAG                                                                                                                                                                                                                                                                                                                                                                                                                                                                                                                                                                                                                                                                                                                                                                                                                                                                                                                                                                                                                                                                                                                                                                                                                                                                                                             |
| SS8 /1.3              | 158  | GAAGATTAGAGTGCGAAGGAACGGCCTCGTTCTCGTCGGAATTGCTCCGAAATCGTGGTCTCTC<br>GTTGAAGGCCTAACTACCGGAGTTGCCGTTTTCTTGAGAATTGCTCGCTTTTTTCGACCAAAGC<br>GCACCAAACATACCTTATTATGATGTGTC                                                                                                                                                                                                                                                                                                                                                                                                                                                                                                                                                                                                                                                                                                                                                                                                                                                                                                                                                                                                                                                                                                                                                                                                                                                                                                                                                                                                                                                                                                                               |

|              |     |                                                                                                                                                                                                                                                                                                                                                                                                                                     |
|--------------|-----|-------------------------------------------------------------------------------------------------------------------------------------------------------------------------------------------------------------------------------------------------------------------------------------------------------------------------------------------------------------------------------------------------------------------------------------|
| SS123/0.056  | 170 | TTTTTTCGACCAAAAGCCACACACACCCTTATTGTGACGTGTCCCGGTAAAAAGTGTGCAA<br>GAACGGCATCGTTGTCGTCGAAATTGGTTCGAAATCGAGGTTGTTCCGTAGGAAGCTCATTGCT<br>AGCTTAACCTCCGTGAATCCTCGTTTTCCTTAGAATCGGCTG                                                                                                                                                                                                                                                     |
| SS337/0.0098 | 397 | TTGGGTGGTAACGGCGGTGCAAGATGTACGGATTGTCGTTTCGAGGGGAGGATTGTTGGGGTTG<br>GCAAACCCATCCCACATCGGAAGATAGAAGAAGGAATAACTTCTATATAATAAAGTCCACCAC<br>TAATTAGTATGAGGCCTTTTGGGAAGGAGCCCAAAACAAATCCGTGCGGGCTCGGCCAAAG<br>CGGACAATATCATACTAATGACGGAATGGTGCGGTGGCAGTCCCTAACAGTGGTATCAGAGC<br>CGATGGTTTCGGCTGGGCCCAATATGTGGGCGGGTGGAGACTGCTTCCCGATGATGGAGGTAA<br>ACCCCAAGTGAGCTCACGATTGAATCCGGTGGTTCCTTGTGTCGAAAGTCTTCCTGATAGTGTG<br>GTCAGGCGGCGAGTCCCG |

**Table S2.** BLAST homology and FISH chromosome mapping of the satDNAs revealed in repeatomes of *S. officinalis* and *S. sclarea*.

| Tandem Repeat             | Blast Homology (between the Revealed Tandem Repeats)                                                                   | BLAST Homology (Available NCBI Data)                                                                                                                 | FISH Chromosome Localization                                                                                                                                             |
|---------------------------|------------------------------------------------------------------------------------------------------------------------|------------------------------------------------------------------------------------------------------------------------------------------------------|--------------------------------------------------------------------------------------------------------------------------------------------------------------------------|
| <i>Salvia officinalis</i> |                                                                                                                        |                                                                                                                                                      |                                                                                                                                                                          |
| SO3                       | 69% of identity with SO97;<br>74% of identity with SO107;<br>71% of identity with SO108,<br>69.4% of identity with SS1 | no                                                                                                                                                   | A large cluster was localized in the subtelomeric region of the long arm of chromosome pair 4                                                                            |
| SO4                       |                                                                                                                        | <i>Theobroma cacao</i> genome assembly, chromosome: II, LT594789.1                                                                                   | A large cluster was localized in the subtelomeric region of the long arm of one or two homologs of chromosome pair 5                                                     |
| SO44                      |                                                                                                                        | no                                                                                                                                                   | Small clusters were localized in the pericentromeric region of all chromosomes;                                                                                          |
| SO46                      |                                                                                                                        | no                                                                                                                                                   | In the NOR region of chromosome pair 3                                                                                                                                   |
| SO48                      |                                                                                                                        | Putative LTR elements;<br><i>Lotus japonicus</i> B-129 DNA, chromosome 2, AP022630.1; <i>Quercus robur</i> genome assembly, chromosome 9, OW028772.1 | A large cluster was localized in the subtelomeric region of the long arm of chromosome pair 4                                                                            |
| SO97                      | 69% of identity with SO3;<br>86,5% of identity with SO107; 77% of identity with SS1                                    | <i>Ipomoea trifida</i> cultivar NCNSP0306 chromosome 13 CP025656.199;                                                                                | A large cluster was localized in the subtelomeric region of the long arm of chromosome pair 4                                                                            |
| SO107                     | 74% of identity with SO3;<br>86,5% of identity with SO97;<br>80% of identity with SO108;<br>83.7% of identity with SS1 | no                                                                                                                                                   | A large cluster was localized in the subtelomeric region of the long arm of chromosome pair 4, and small clusters were detected in the subtelomeric regions of both arms |
| SO108                     | 71% of identity with SO3;<br>80% of identity with SO107                                                                | <i>Ipomoea trifida</i> cultivar NCNSP0306 chromosome 15 CP025658.1; <i>Jasminum sambac</i> cultivar Hutoumoli linkage group Lg13 CP073644.1          | A large cluster was localized in the subtelomeric region of the long arm of chromosome pair 4                                                                            |
| SO113                     |                                                                                                                        | no                                                                                                                                                   | Small clusters were localized in the pericentromeric region of all chromosomes                                                                                           |
| SO145                     |                                                                                                                        | no                                                                                                                                                   | A large cluster was localized in the subtelomeric region of the long arm of chromosome pair 4                                                                            |
| SO202                     |                                                                                                                        | no                                                                                                                                                   | A large cluster was localized in the subtelomeric region of the long arm of                                                                                              |

|       |                                                                                     |                                                                        |                                                                                                                                                                                                                     |
|-------|-------------------------------------------------------------------------------------|------------------------------------------------------------------------|---------------------------------------------------------------------------------------------------------------------------------------------------------------------------------------------------------------------|
|       |                                                                                     |                                                                        | chromosome pair 4, and a minor site was detected in the subtelomeric region of the short arm of one homolog of chromosome pair 6                                                                                    |
| SO342 |                                                                                     | no                                                                     | Dispersed hybridization signals were distributed along all chromosomes                                                                                                                                              |
|       |                                                                                     | <i>Salvia sclarea</i>                                                  |                                                                                                                                                                                                                     |
| SS1   | 83.7% of identity with SO107; 77% of identity with SO97; 69.4% of identity with SO3 | no                                                                     | Small clusters were localized in the subtelomeric regions of both arms of all chromosomes. In <i>S. officinalis</i> , a large cluster was localized in the subtelomeric region of the long arm of chromosome pair 4 |
| SS8   |                                                                                     | no                                                                     | Small polymorphic clusters were localized in the subtelomeric regions of both arms (except chromosome pair 5 and 11) and also in the pericentromeric region of chromosomes                                          |
| SS123 |                                                                                     | no                                                                     | Small clusters were localized in the pericentromeric region of all chromosomes                                                                                                                                      |
| SS337 |                                                                                     | <i>Arabidopsis arenosa</i> genome assembly, chromosome: 4-8 LR999455.1 | Small clusters were localized in the subtelomeric regions of both arms of all chromosomes                                                                                                                           |

**Table S3.** List of the oligonucleotide FISH probes.

| Tandem Repeat | Oligo FISH probe sequence                                           |
|---------------|---------------------------------------------------------------------|
| SO3           | GAAGGAGATA GGCCAAAAC GGTGTTCGCG TTGAACGCAA<br>CCGTAGCACA CTCCAA     |
| SO4           | AGAAAACTC CCCGGATCCT TTTGCTTTGA TGGGAGCTTG<br>TTTTGAAGTA TGACA      |
| SO44          | TTTGCTT CCGGAGATGC TACGCATCAC CCGTGGCGGA<br>GCGGCGGCTT              |
| SO46          | CGCGCATCGT CGGGGGCTGC CCGCGCAGGG GCG                                |
| SO48          | ATCCAAGGCT TTGGTGAAAA TATCTGCTAT CTGTTTTTCA<br>GTTGGAACAAATTTAATGCA |
| SO97          | AAAGTTGTAG CCCTCTGAGT AAGCTTTCCA ACGGTATAAA<br>GACCGCTGTG AATGGACCA |
| SO107         | TTGGAGGATC CGCCAAAAT ACGGAAAATT TCGACCGAGC<br>CAAATGTCGA ATCCGACCCT |
| SO108         | CCTTTCA CCCGAACACT GTTTTGACCA TATCTCCTTA<br>GATATGGGCT GTCTTGGGCC   |
| SO113         | TTGTGGACAC TTGTACCGTA GGAGTATATA TGCTTCTCTA<br>AGCCCTAAAC           |
| SO145         | TCGAACAAGA GAGGGGATAT CCACTGATAT GCCCGAACGA<br>TAGAG                |
| SO202         | GGAAATAGTT ACCAAGTACA TCACCATAAG TATTGGAAAT<br>TTCCACGGTA GCGTTACCG |
| SO342         | ATATAGAATA TAATATATGG AGTTTCATTA TATTAATATA<br>CTCTATCATA           |
| SS1           | GTCGTAGCCC TCTGAAGTGG CTTTCCAACG ATATGCTGAC<br>CGCTGC               |
| SS8           | GAATTGCTCG CTTTTTCGAC CAAAGCGCAC CAAACATACC<br>TTTATTATGA TGT       |
| SS123         | TCCGTAGGAA GCTCATTGCT AGCTTAACTC CGTGAATCCT<br>CGTTTTTCTT TA        |

---

SS337

AGGGGAGGAT TGTGTTGGGGTT GGCAAACCCA TCCCACATCG  
GAAGATAGAA GAAGGAA

---

**Figure S1.** The raw images from Figure 5.

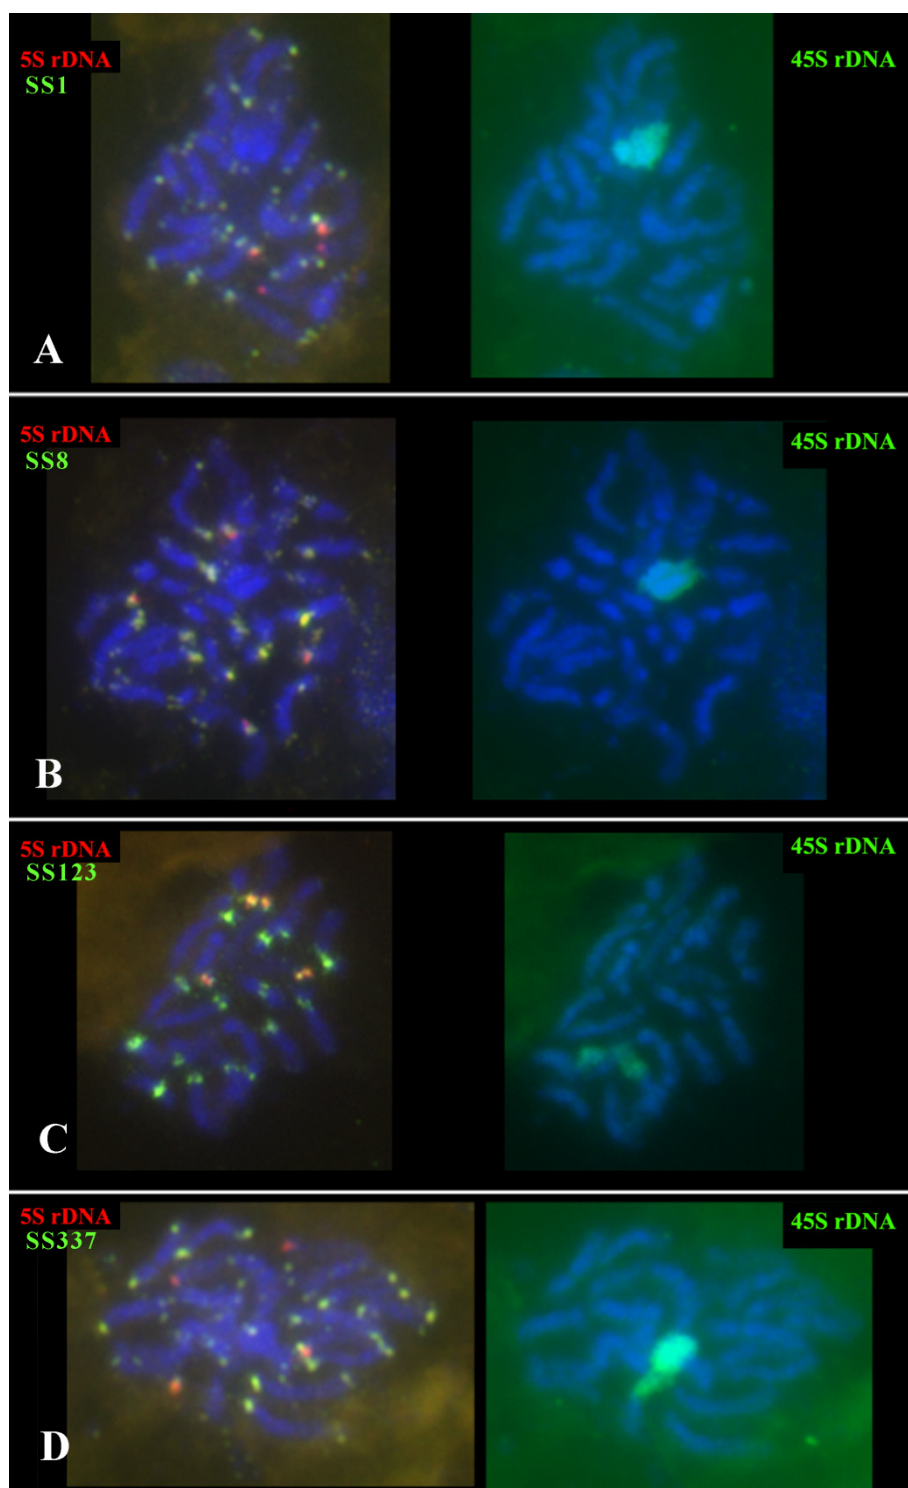

Supplement: s1 [file s1]
